# Supplementary material for: Direct radiative effect of carbonaceous aerosols from crop residue burning during the summer harvest season in East China
Source: Copernicus journal article supplement (doi:10.5194/acp-2016-759), 2016-11-08
Supplement: Supplementary file 1 [file acp-2016-759-supplement.pdf]

## **Table Captions**

Table S1. Descriptions of the sensitivity test simulations

Table S2. The OA mass concentration contributions from crop residue burning and its DRE due to absorption for the sensitivity test simulations.

Table S1. Descriptions of the sensitivity test simulations.

| Simulation       | Emission inventory                                    | BC-to-OC ratio | OA absorptivity       | Mixing state  |
|------------------|-------------------------------------------------------|----------------|-----------------------|---------------|
| K1.3_BASE        | Comprehensive                                         | 0.27           | $k_{OA}^* \times 1.3$ | Shell/Core    |
| K1.3_NOOACB      | All without the OA emission from crop residue burning | 0.27           | $k_{OA}^* \times 1.3$ | Shell/Core    |
| K1.5_BASE        | Comprehensive                                         | 0.27           | $k_{OA}^* \times 1.5$ | Shell/Core    |
| K1.5_NOOACB      | All without the OA emission from crop residue burning | 0.27           | $k_{OA}^* \times 1.5$ | Shell/Core    |
| RATIO0.18_BASE   | Comprehensive                                         | 0.18           | Saleh et al. (2014)   | Shell/Core    |
| RATIO0.18_NOOACB | All without the OA emission from crop residue burning | 0.18           | Saleh et al. (2014)   | Shell/Core    |
| RATIO0.18_NOBRC  | Comprehensive                                         | 0.18           | None                  | Shell/Core    |
| RATIO0.42_BASE   | Comprehensive                                         | 0.42           | Saleh et al. (2014)   | Shell/Core    |
| RATIO0.42_NOOACB | All without the OA emission from crop residue burning | 0.42           | Saleh et al. (2014)   | Shell/Core    |
| RATIO0.42_NOBRC  | Comprehensive                                         | 0.42           | None                  | Shell/Core    |
| VM_BASE          | Comprehensive                                         | 0.27           | Saleh et al. (2014)   | Volume mixing |
| VM_NOCB          | All without crop residue burning                      | 0.27           | Saleh et al. (2014)   | Volume mixing |

$k_{OA}^*$ : the imaginary part of OA's refractive index, see equations (1), (2) and (3) (Saleh et al. 2014).

Table S2. The OA mass concentration contributions from crop residue burning and its DRE due to absorption for the sensitivity test simulations.

| Testing item    | Value                 | OA mass concentration contributions from crop residue burning (%) | crop residue burning OA DRE due to absorption ( $\text{W m}^{-2}$ ) |
|-----------------|-----------------------|-------------------------------------------------------------------|---------------------------------------------------------------------|
| OA absorptivity | $k_{OA}^* \times 1.3$ | 30.3 <sup>a</sup>                                                 | +1.05 <sup>e</sup>                                                  |
|                 | $k_{OA}^* \times 1.5$ | 30.3 <sup>b</sup>                                                 | +1.22 <sup>f</sup>                                                  |
| BC-to-OC ratio  | 0.18                  | 30.4 <sup>c</sup>                                                 | +0.96 <sup>g</sup>                                                  |
|                 | 0.42                  | 30.0 <sup>d</sup>                                                 | +0.81 <sup>h</sup>                                                  |

<sup>a</sup> The differences of OA mass concentrations at surface between K1.3\_BASE and K1.3\_NOOACB divided by the corresponding OA mass concentration at surface in K1.3\_BASE simulation, respectively.

<sup>b</sup> The differences of OA mass concentrations at surface between K1.5\_BASE and K1.5\_NOOACB divided by the corresponding OA mass concentration at surface in K1.5\_BASE simulation, respectively.

<sup>c</sup> The differences of OA mass concentrations at surface between RATIO0.18\_BASE and RATIO0.18\_NOOACB divided by the corresponding OA mass concentration at surface in RATIO0.18\_BASE simulation, respectively.

<sup>d</sup> The differences of OA mass concentrations at surface between RATIO0.42\_BASE and RATIO0.42\_NOOACB divided by the corresponding OA mass concentration at surface in RATIO0.42\_BASE simulation, respectively.

<sup>e</sup> By multiplying the shortwave flux change differences between K1.3\_BASE and NOBRC with the corresponding OA mass concentration contribution from crop residue burning.

<sup>f</sup> By multiplying the shortwave flux change differences between K1.5\_BASE and NOBRC with the corresponding OA mass concentration contribution from crop residue burning.

<sup>g</sup> By multiplying the shortwave flux change differences between RATIO0.18\_BASE and NOBRC with the corresponding OA mass concentration contribution from crop residue burning.

<sup>h</sup> By multiplying the shortwave flux change differences between RATIO0.42\_BASE and NOBRC with the corresponding OA mass concentration contribution from crop residue burning.

## Figure Captions

Figure S1. Time series of the (a) temperature and (b) relative humidity at 2 m above ground surface (T2 and RH2, respectively) and the (c) wind speed at 10 m above ground (WS10) observations (black dot) versus the corresponding WRF-Chem simulations (blue line) at three typical sites (Mengcheng, Suxian, and Xuzhou) in Eastern China in June 2013.

Figure S2. Time series of the observed (dots) and simulated (line) (a) PM<sub>2.5</sub>, (b) sulfate, (c) ammonium and (d) nitrate mass concentrations ( $\mu\text{g}/\text{m}^3$ ) at the Suixi site.

Figure S3. Spatial distributions of (a) carbonaceous aerosols mass concentration ( $\mu\text{g}/\text{m}^3$ ) and (b) its contribution from crop residue burning (%) in the three typical hours (6:00) during the summer harvest in June 2013.

Figure S4. Scatterplots of simulated hourly AOD and corresponding MODIS AOD at 23 sites in June 2013. Normalized mean bias (NMB) and the correlation coefficient (R) are given in the scatterplot.

**Mengcheng (33.28, 116.53)**

**Suxian (33.63, 116.98)**

**Xuzhou (34.28, 117.15)**

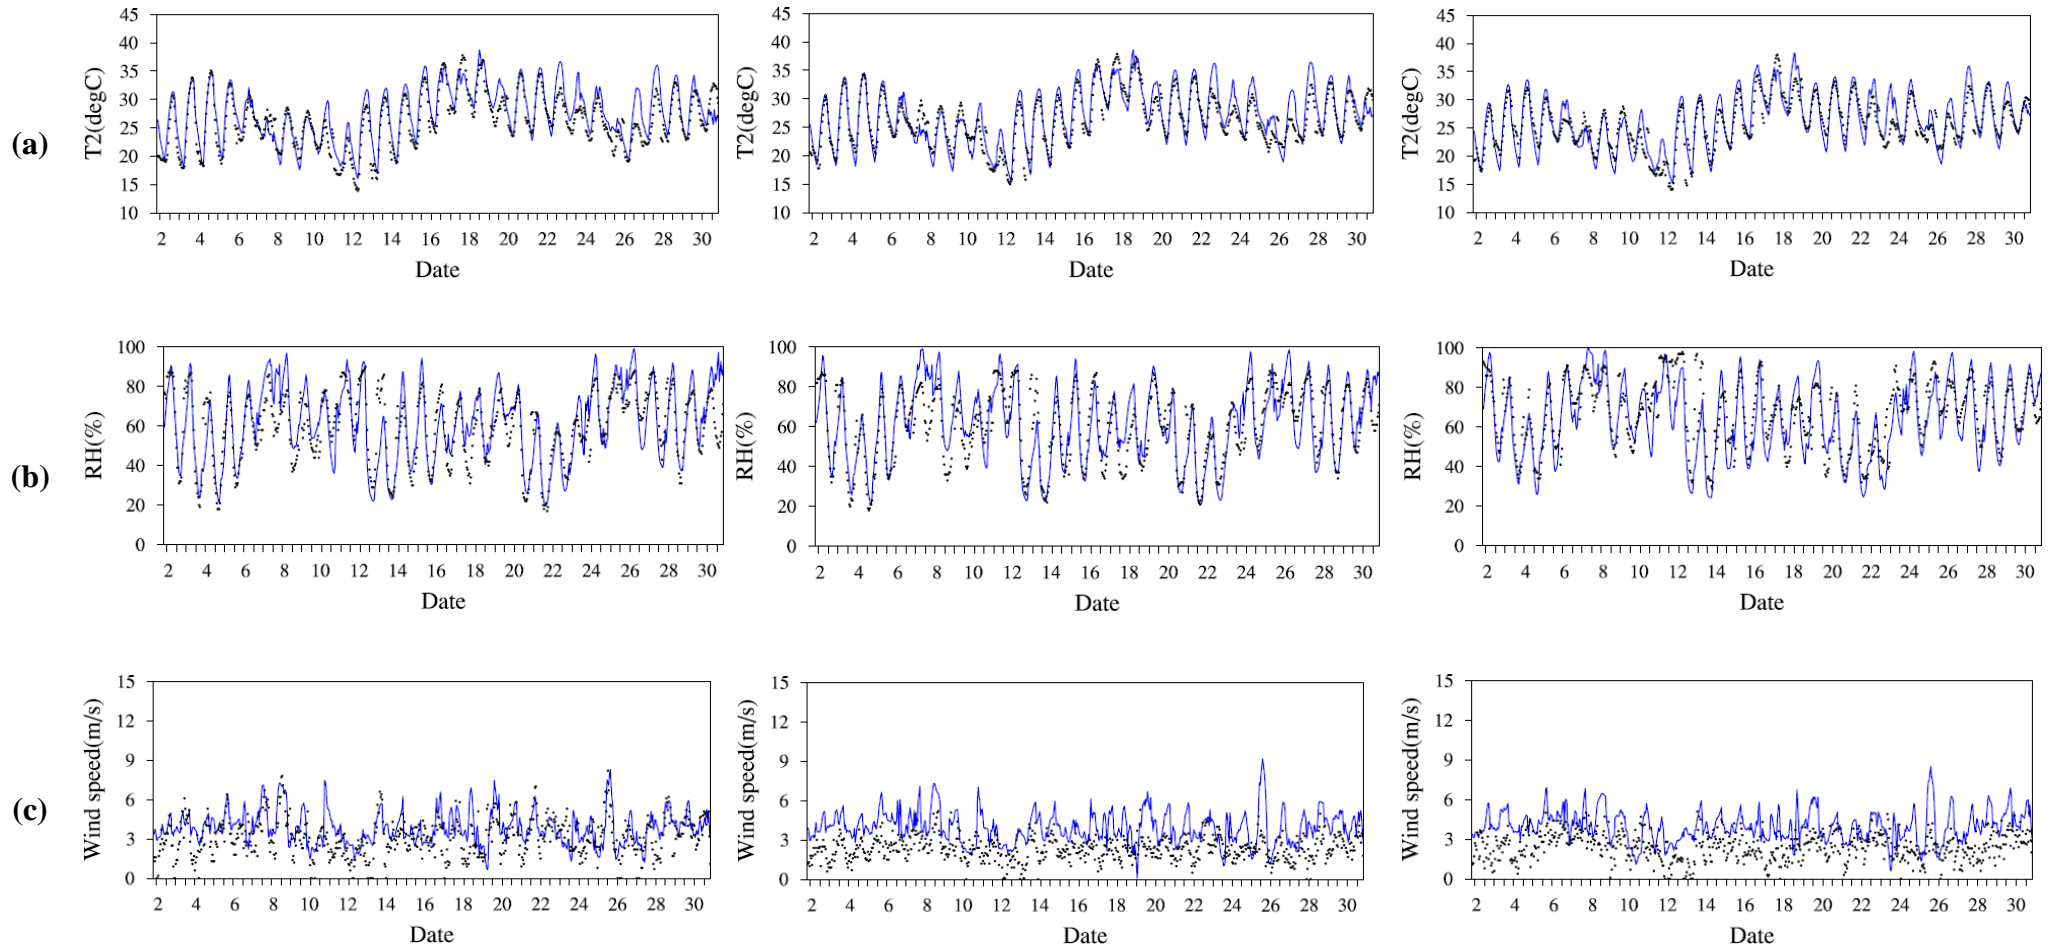

Figure S1. Time series of the (a) temperature and (b) relative humidity at 2 m above ground surface (T2 and RH2, respectively) and the (c) wind speed at 10 m above ground (WS10) observations (black dot) versus the corresponding WRF-Chem simulations (blue line) at three typical sites (Mengcheng, Suxian, and Xuzhou) in Eastern China in June 2013.

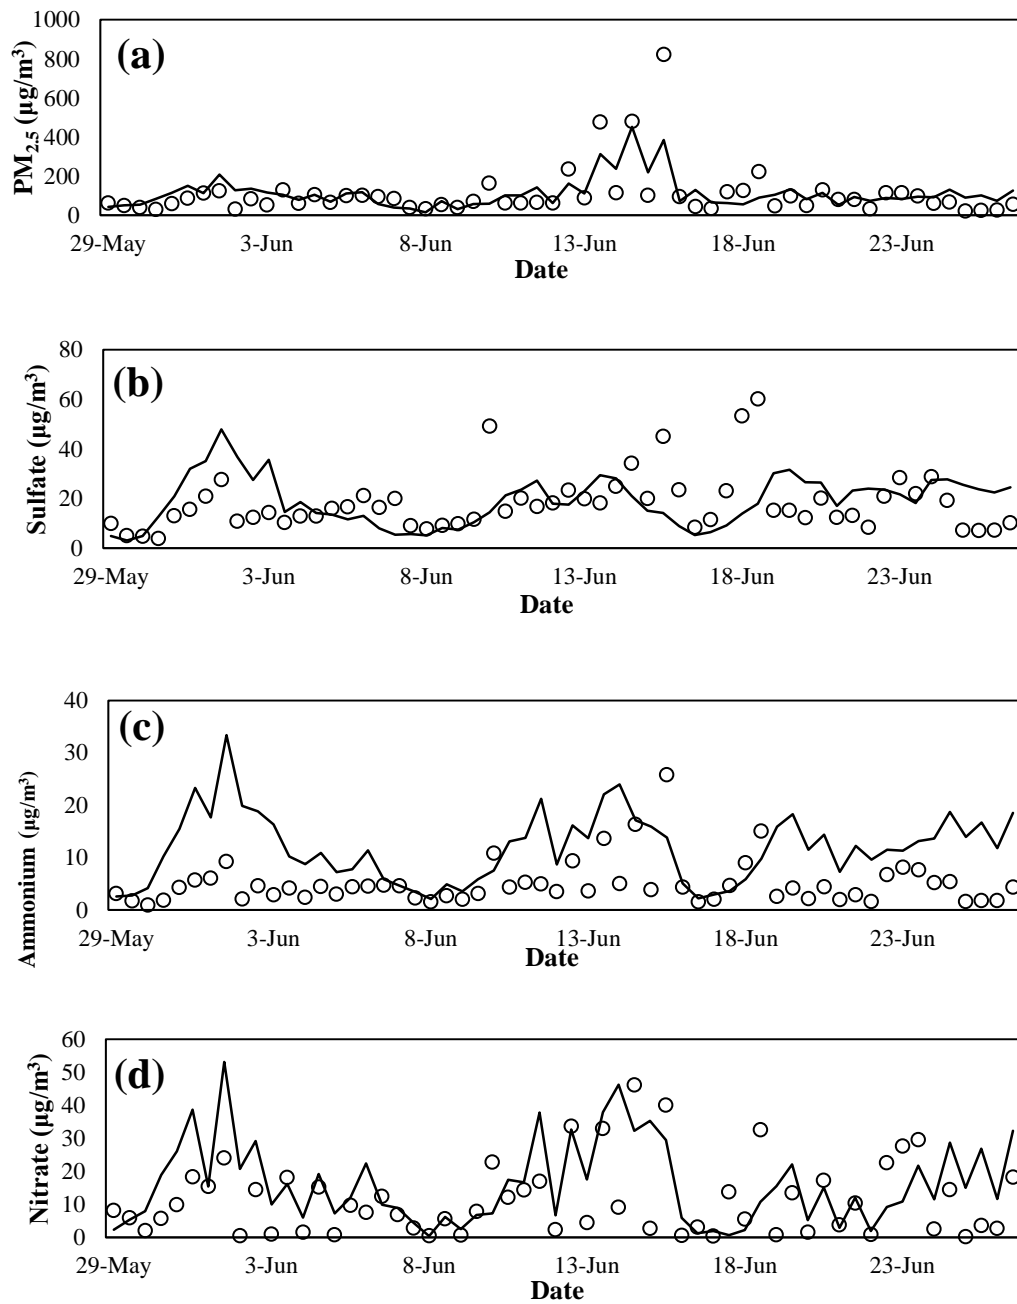

Figure S2. Time series of the observed (dots) and simulated (line) (a) PM<sub>2.5</sub>, (b) sulfate, (c) ammonium and (d) nitrate mass concentrations (µg/m<sup>3</sup>) at the Suixi site.

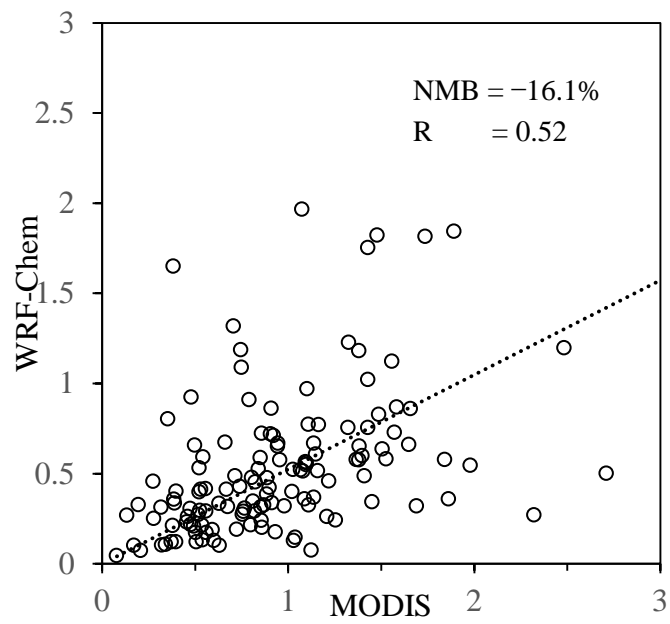

Figure S3. Scatterplots of simulated hourly AOD and corresponding MODIS AOD at 23 sites in June 2013. Normalized mean bias (NMB) and the correlation coefficient (R) are given in the scatterplot.
